# Supplementary material for: 4β-Hydroxycholesterol is a prolipogenic factor that promotes SREBP1c expression and activity through the liver X receptor
Source: PubMed Central journal article supplement (PMC8042401; doi:10.1016/j.jlr.2021.100051), 2021-02-23

**Supplemental Figure 1:**

**A.** 4 $\beta$ -HC and other LXR agonist do not affect AKT phosphorylation. Primary mice hepatocytes were treated o/n with vehicle 4 $\beta$ -HC, 24-HC or GW3965 followed with 40 minutes stimulation with Insulin.

Proteins were extracted and AKT protein level was measured (N=1).

**B.** 4 $\beta$ -HC level do not change between feeding and fasting. Mice were fasted for 16hrs and then refed for 4 hours, followed by liver and serum collection. 4 $\beta$ -HC was measured by mass spectrometry (N=5).

**C.** 4 $\beta$ -HC does not induce ABCA1 in primary mice hepatocytes. Cells were treated o/n with vehicle or 5 $\mu$ M 4 $\beta$ -HC followed with 6hrs stimulation with Insulin. ABCA1 mRNA level was measured by RT-PCR (N=4).

Supplemental Figure 1

A.

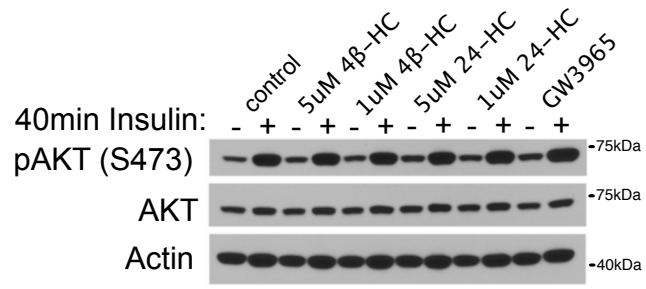

B.

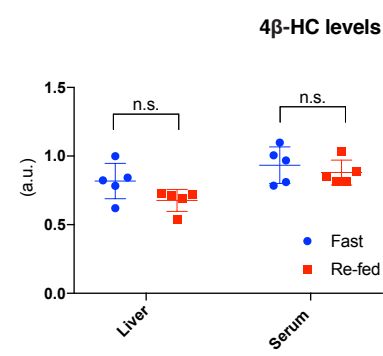

C.

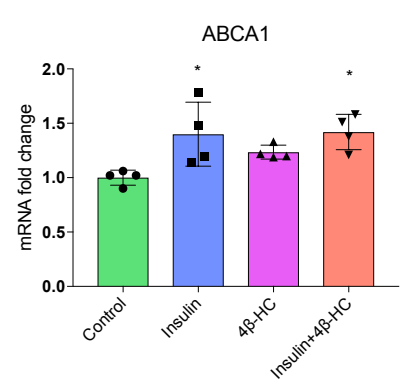

Supplement: mmc1.pdf [file mmc1.pdf]
